# Supplementary material for: Strategy to Predict High and Low Frequency Behaviors Using Triaxial Accelerometers in Grazing of Beef Cattle
Source: MDPI journal article supplement (doi:10.3390/ani11123438), 2021-12-02
Supplement: s1 [file s1]

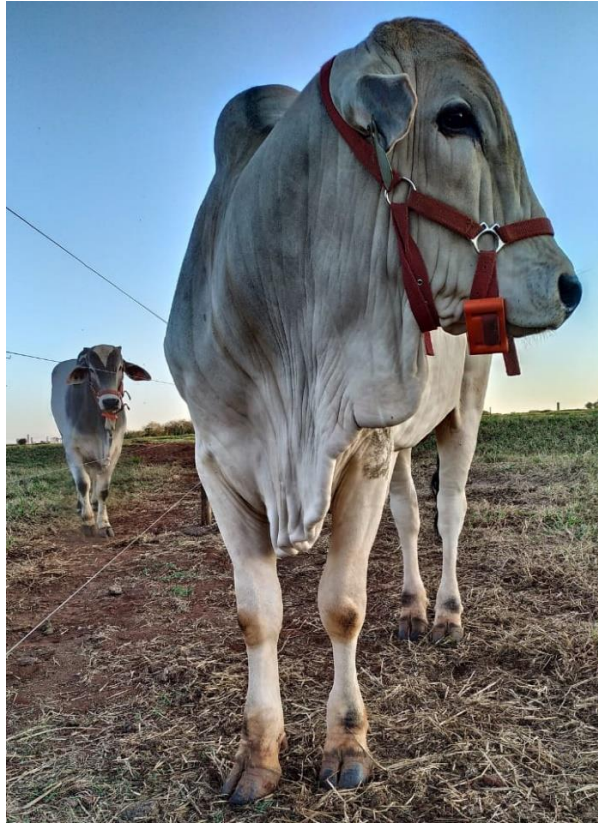

**Figure S1.** Male Nelore with an accelerometer attached to the custom halter in the mandibular region.

**Table S1.** Description for each animal behavior studied.

| Animal behavior | Description                                                                                                                                                                                                                                                                        |
|-----------------|------------------------------------------------------------------------------------------------------------------------------------------------------------------------------------------------------------------------------------------------------------------------------------|
| Grazing         | Animals searching for food while walking short distances with their head down, without picking food up with their mouth; standing still with their head down while apprehending food with their mouth; and chewing either with their head down or their head up, while stationary. |
| Ruminating      | Animals chewing and swallowing a ruminal bolus.                                                                                                                                                                                                                                    |
| Idle            | Animals being idle. Lying down in any resting position or standing up on all four legs, without locomotion.                                                                                                                                                                        |
| WCF             | Animals attending the water fountain.                                                                                                                                                                                                                                              |
| Feeding         | Animals located in the feeding supplement zone, ingesting dietary supplement.                                                                                                                                                                                                      |
| Walking         | Animals walking from one position to another, without searching for food or ruminating.                                                                                                                                                                                            |

---

WCF: Water Consumption Frequency.

**Table S2.** Predictor variables created from x, y, and z axis acceleration variables

| Predictor variables   | Equation                                                                              |
|-----------------------|---------------------------------------------------------------------------------------|
| SMA                   | $ X_i  +  Y_i  +  Z_i $                                                               |
| SVM                   | $\sqrt{X_i^2 + Y_i^2 + Z_i^2}$                                                        |
| Movement variation    | $ X_{i+1} - X_i  +  Y_{i+1} - Y_i  +  Z_{i+1} - Z_i $                                 |
| Energy                | $(X_i^2 + Y_i^2 + Z_i^2)^2$                                                           |
| Entropy               | $(1 + (X_i + Y_i + Z_i))^2 \times \ln(1 + (X_i + Y_i + Z_i)^2)$                       |
| Pitch (degrees)       | $\tanh^{-1} \left( -X_i / \left( \sqrt{Y_i^2 + Z_i^2} \right) \right) \times 180/\pi$ |
| Roll (degrees)        | $\text{atan2}(Y_i Z_i) \times 180/\pi$                                                |
| Inclination (degrees) | $\tan^{-1} \left( (X_i^2 + Y_i^2) / Z_i \right) \times 180/\pi$                       |

SMA – signal magnitude area; SVM – signal vector magnitude [22].
